# Supplementary material for: Vitalized yeast with high ethanol productivity
Source: Royal Society of Chemistry journal article supplement (doi:10.1039/c4ra08809c), 2014-01-01
Supplement: c4ra08809c1.pdf [file c4ra08809c1.pdf]

**Fig.S1**

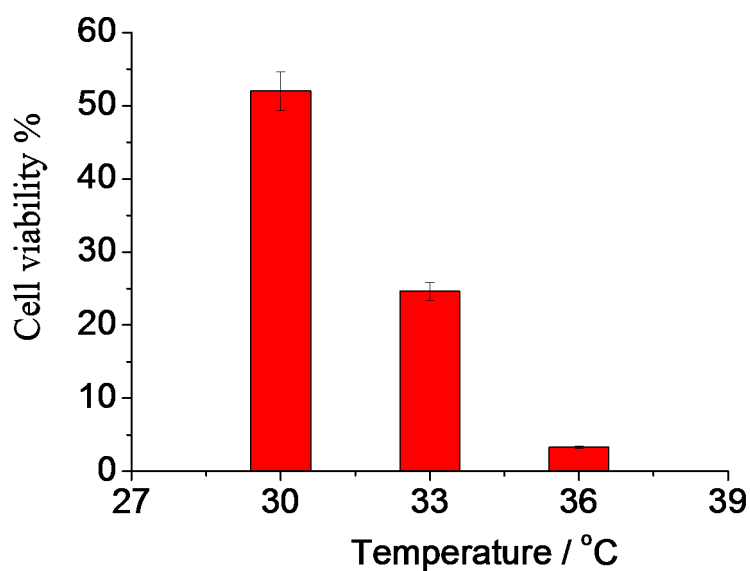

**Fig.S1** Comparison of yeast cell viability under different temperature. Fermentation conditions: 3.5 g D-glucose, approximately  $5 \times 10^8$  cells  $\text{mL}^{-1}$ , 8mL  $\text{H}_2\text{O}$ , 2.0g of PEG-400, 72 h, 160 rpm, and pH of 3.9. All data and error bars represent the averages and standard deviations of triplicate measurements.
